# Supplementary material for: Carbon nanoscroll from C4H/C4F-type graphene superlattice: MD and MM simulation insights
Source: Royal Society of Chemistry journal article supplement (doi:10.1039/c4cp04102j), 2014-12-04
Supplement: c4cp04102j1.pdf [file c4cp04102j1.pdf]

## Carbon Nanoscroll from C<sub>4</sub>H/C<sub>4</sub>F-type Graphene Superlattice: MD and MM

### Simulation Insights

Zilong Liu,<sup>ab</sup> Qingzhong Xue,<sup>\*abc</sup> Yehan Tao,<sup>b</sup> Xiaofang Li,<sup>b</sup> Tiantian Wu,<sup>b</sup>

Yakang Jin<sup>b</sup> and Zhongyang Zhang<sup>b</sup>

---

<sup>a</sup> *State Key Laboratory of Heavy Oil Processing, China University of Petroleum, Qingdao 266580, Shandong, P. R. China*

<sup>b</sup> *College of Science, China University of Petroleum, Qingdao 266580, Shandong, P. R. China*

<sup>c</sup> *Shengli-highland Limited Company, Dongying 257062, Shandong, P. R. China*

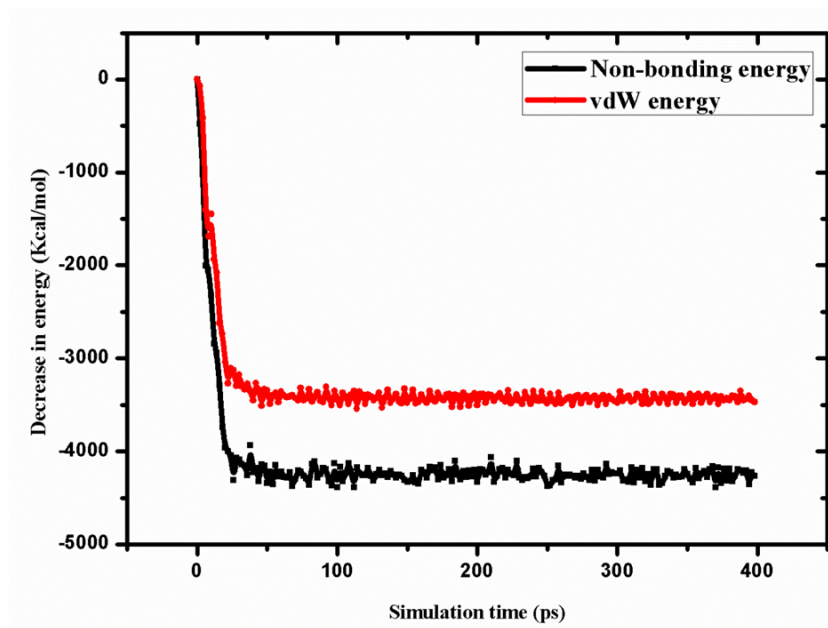

(a)

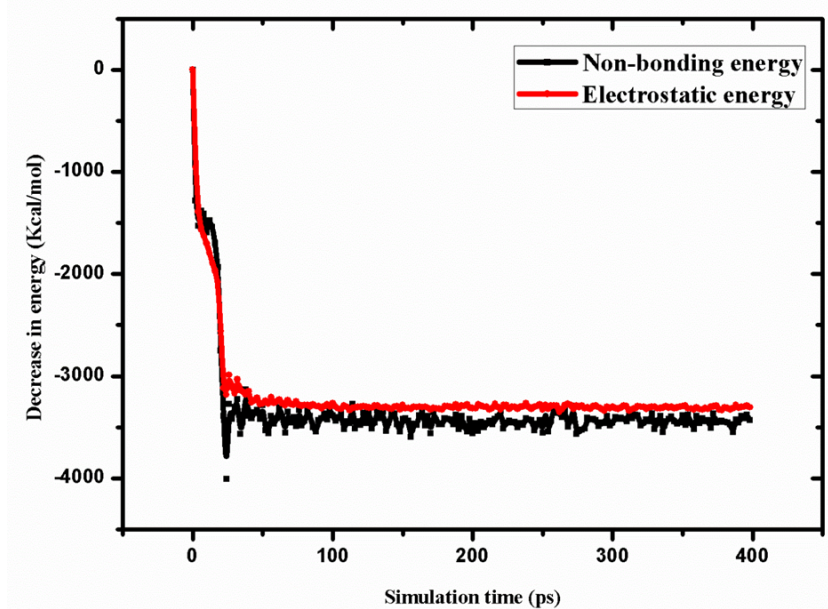

(b)

**Fig.S1** The decrease in energy as a function of simulation time. (a) non-bonding energy and van der Waals (vdW) energy in C<sub>4</sub>H scrolls of Fig.2a. (b) non-bonding energy and electrostatic energy in C<sub>4</sub>F scrolls of Fig.2b.

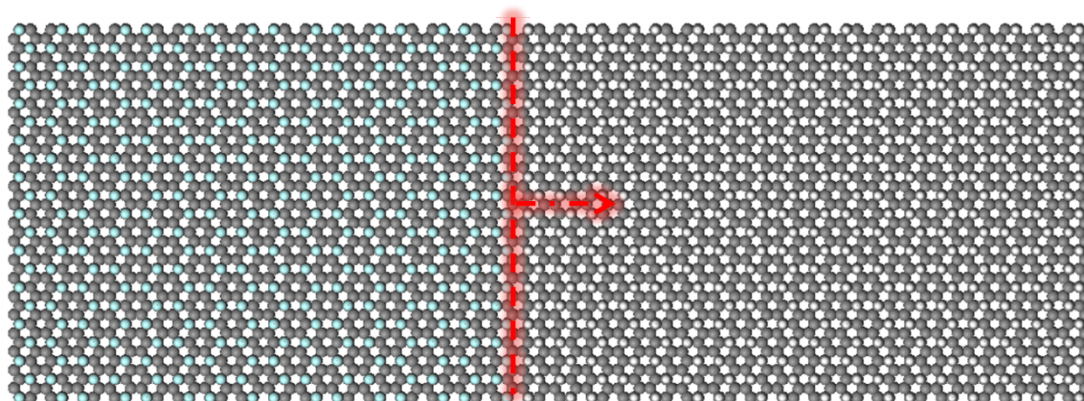

(a)

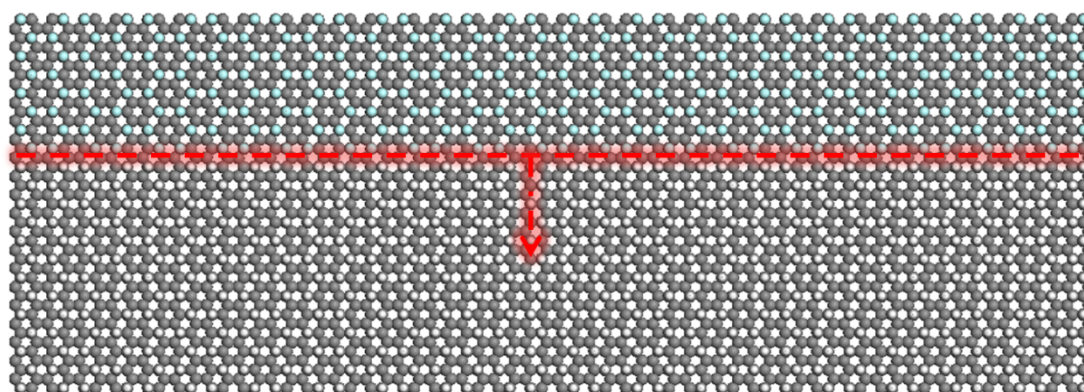

(b)

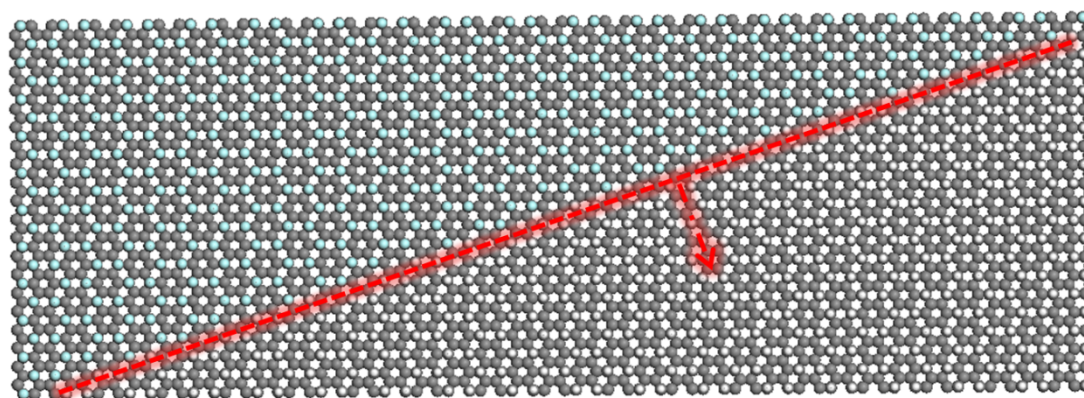

(c)

**Fig.S2** Functionalized directions: X-direction (a), Y-direction (b), and Diagonal direction (c) in  $C_4H/C_4F$ -type graphene superlattices. Grey, white, and blue balls represent C, H, and F atoms, respectively.



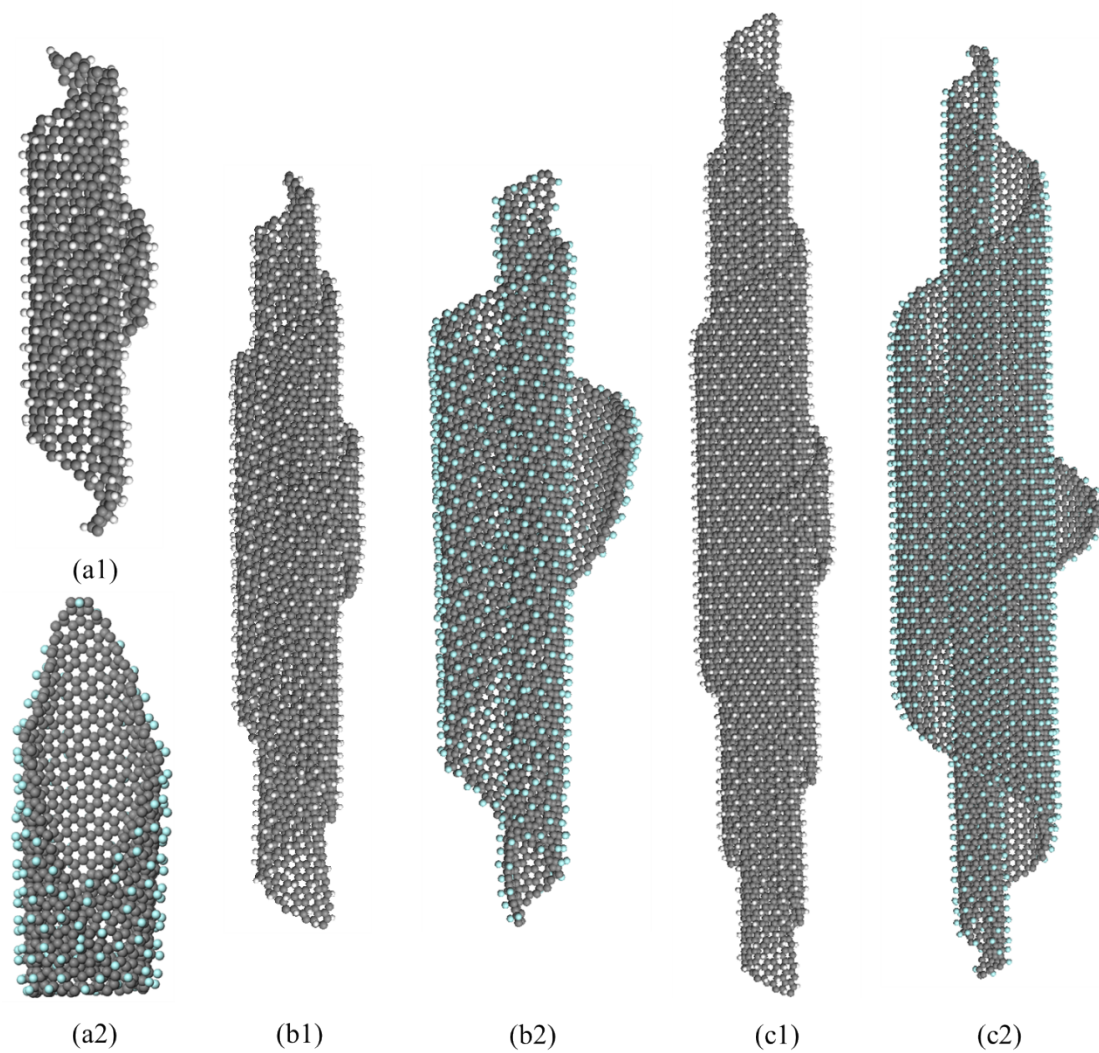

**Fig.S3** Snapshots of CNS structures formed by various edge length (68.83, 144.73, 218.63 Å) of equilateral triangle of  $C_4H$  (a1-c1) and  $C_4F$  (a2-c2).
